# Supplementary material for: Adsorption and self-assembly of a ferrocene d- and l-nonapeptide disulfide onto gold and mica substrates
Source: Royal Society of Chemistry journal article supplement (doi:10.1039/c4nj00278d), 2014-01-01

## Supplementary Material

Adsorption and Self-Assembly of a Ferrocene D- and LNonapeptide Disulfide on Gold and Mica Substrates

Vianney Aseret Hernandez Ramirez, Alain Pailleret, Suzanne Joiret, Fanny d'Orlyé, Mathieu Lazerges, Hubert Perrot, Silvia Gutierrez Granados, Fethi Bedioui, Luis Manuel De León-Rodríguez

New Journal of Chemistry, April 30<sup>th</sup> 2014

### 1. Peptide purification by HPLC.

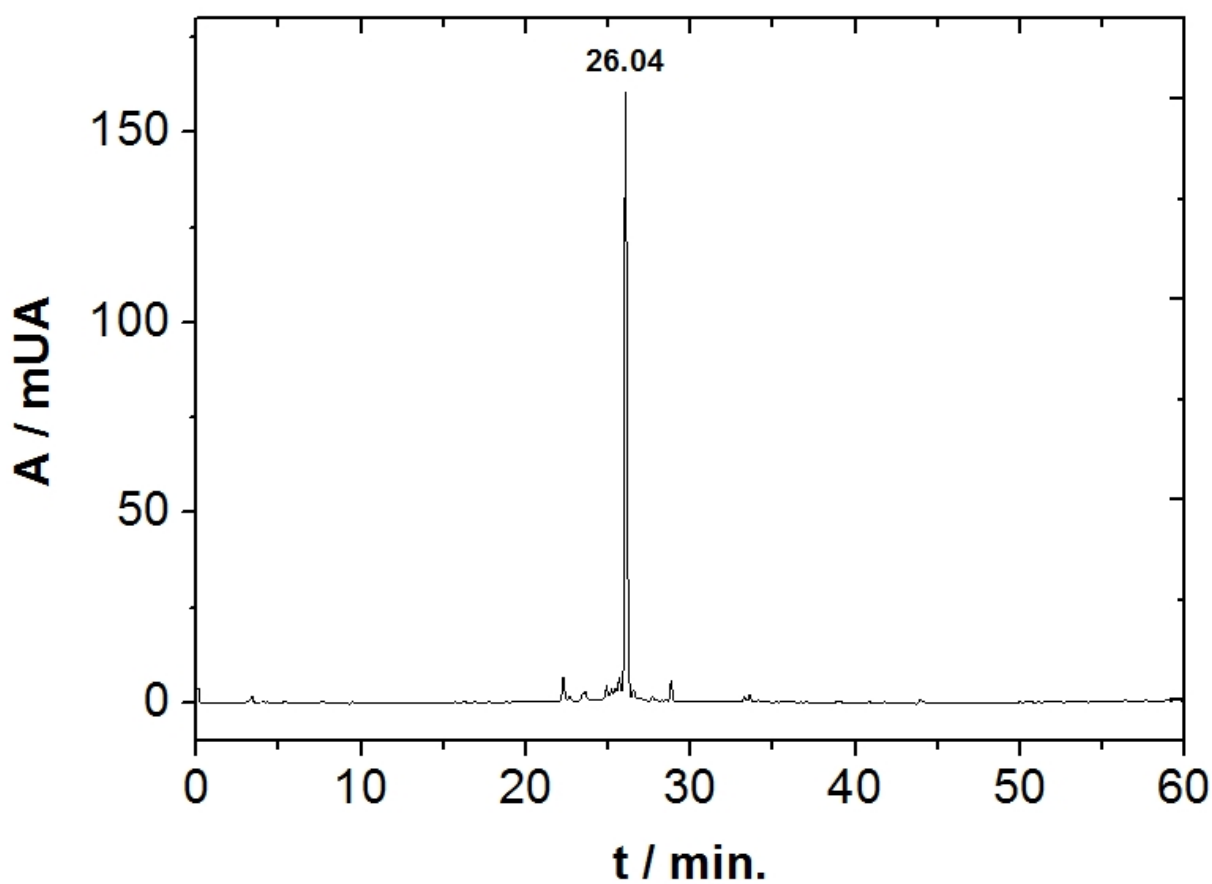

## 2. Peptide mass spectrum.

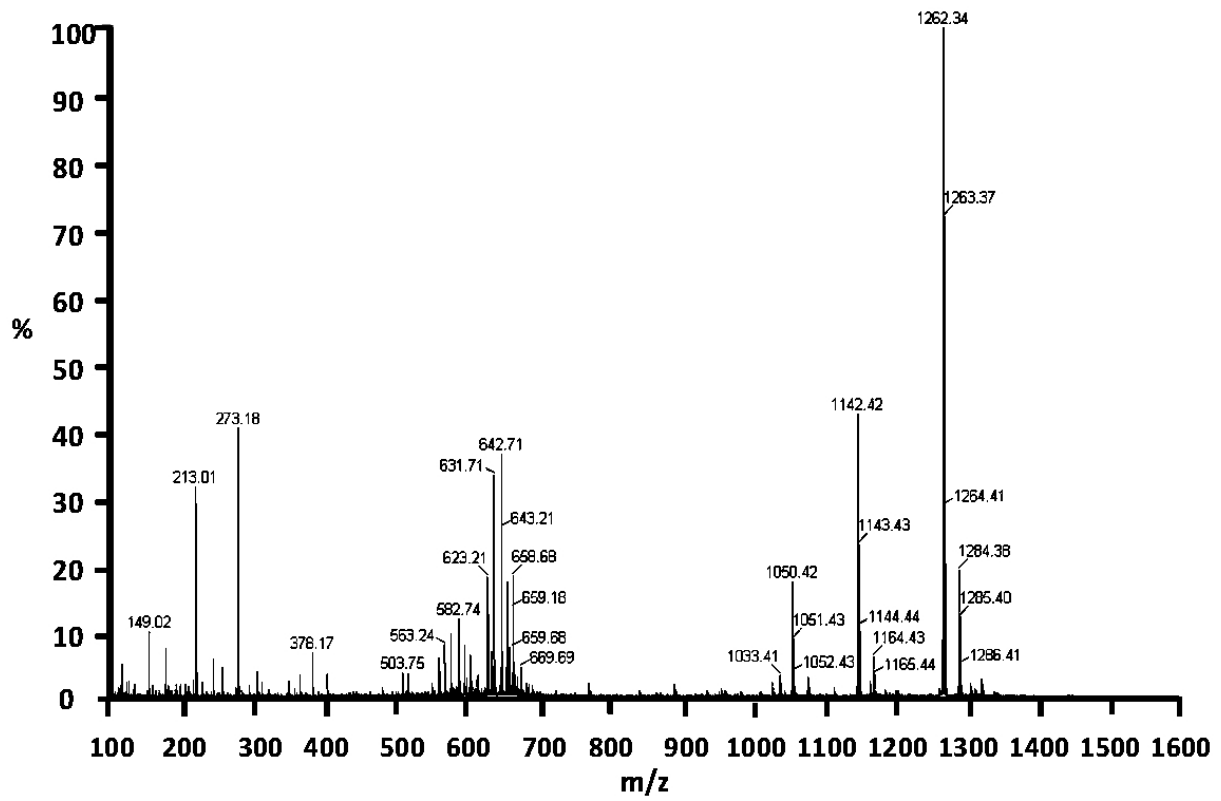

### 3. Solid peptide Raman spectrum.

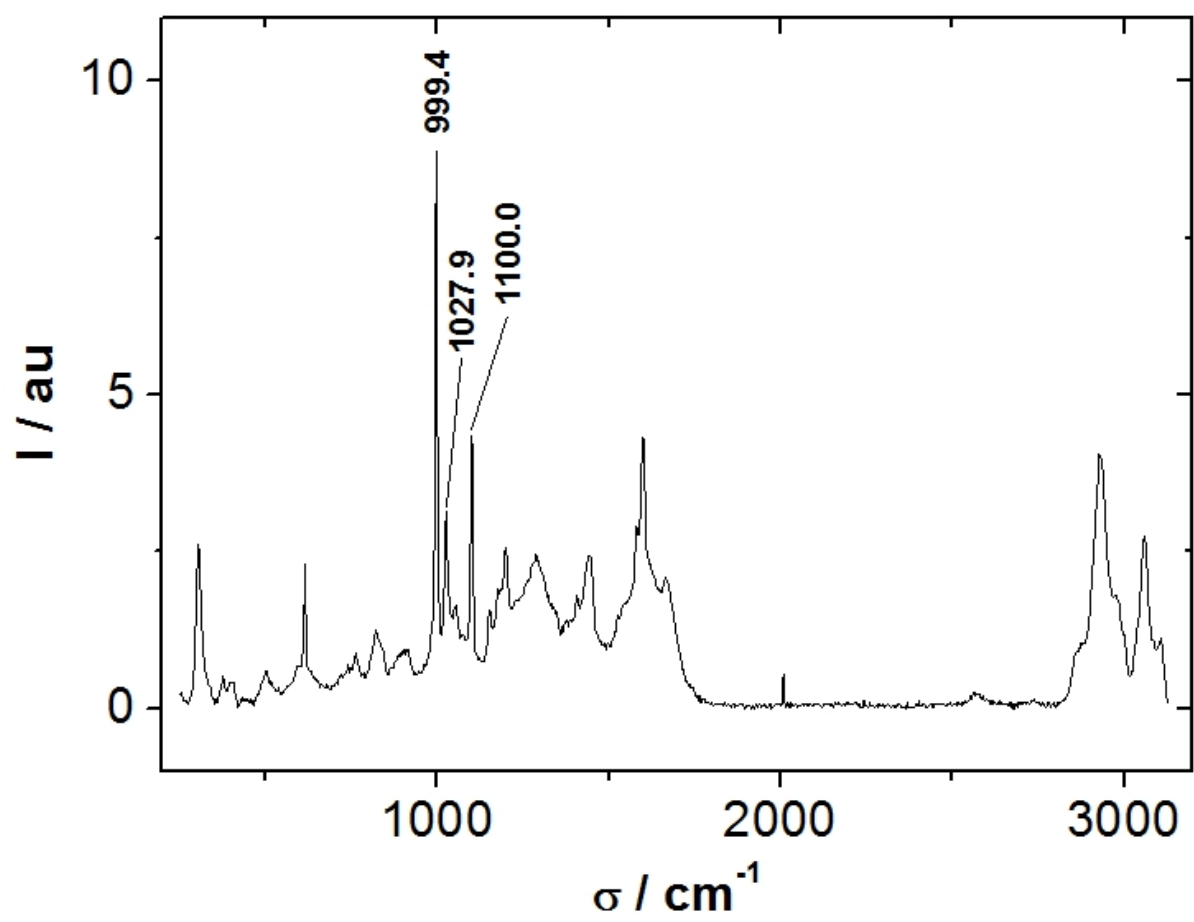

4.  $^1\text{H}$  (200 MHz,  $\text{D}_2\text{O}/\text{CD}_3\text{CN}$ ) NMR spectrum Fc-cyclic-nonapeptide.

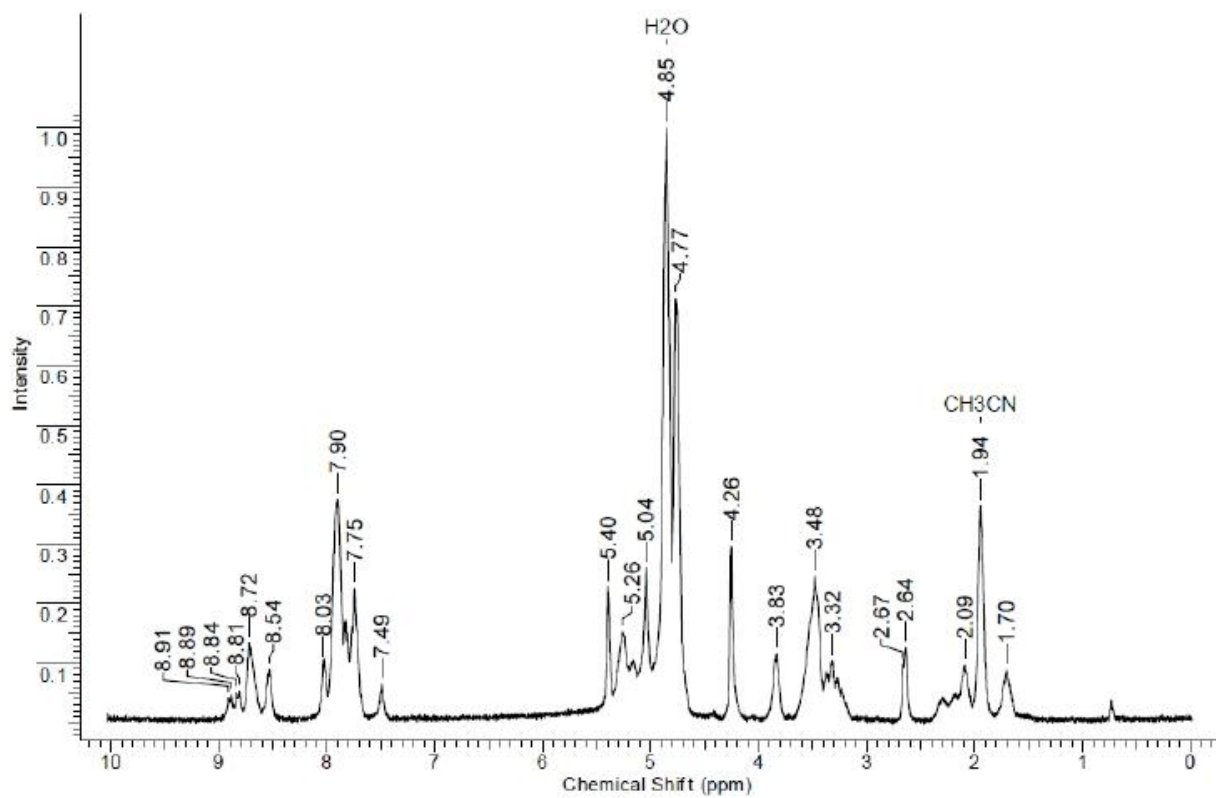

Supplement: c4nj00278d1.pdf [file c4nj00278d1.pdf]
